# Supplementary material for: A new family of one-dimensional bromo-bridged Ir(iv)–Cu(ii) complexes based on the hexabromoiridate(iv) metalloligand
Source: Royal Society of Chemistry journal article supplement (doi:10.1039/d1dt04384f), 2022-01-01
Supplement: d1dt04384f1.pdf [file d1dt04384f1.pdf]

## Electronic Supplementary Information (ESI)

### A new family of one-dimensional bromo-bridged Ir(IV)-Cu(II) complexes based on the hexabromoiridate(IV) metalloligand

Adrián Sanchis-Perucho and José Martínez-Lillo\*

*Instituto de Ciencia Molecular (ICMol)/Departament de Química Inorgànica, Universitat de València, C/Catedrático José Beltrán 2, 46980, Paterna, Valencia, Spain.*

| Table of contents | page |
|-------------------|------|
| Figure S1 .....   | 2    |
| Figure S2 .....   | 3    |
| Table S1.....     | 4    |
| Figure S3 .....   | 5    |
| Figure S4 .....   | 5    |
| Figure S5 .....   | 6    |
| Figure S6 .....   | 7    |
| Figure S7 .....   | 8    |
| Figure S8 .....   | 8    |

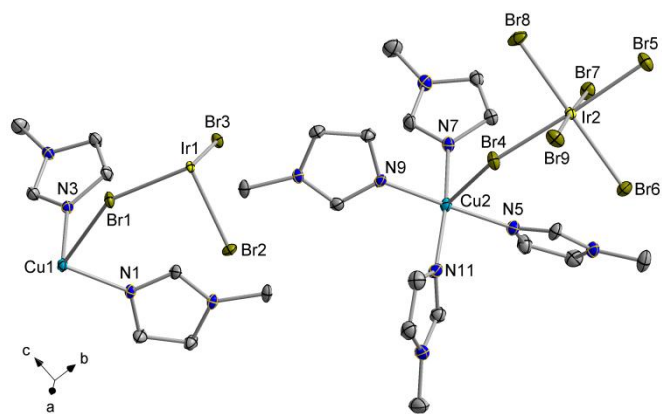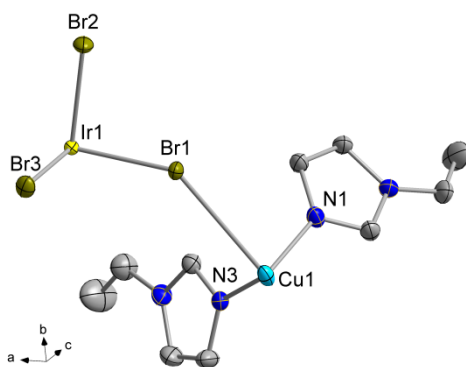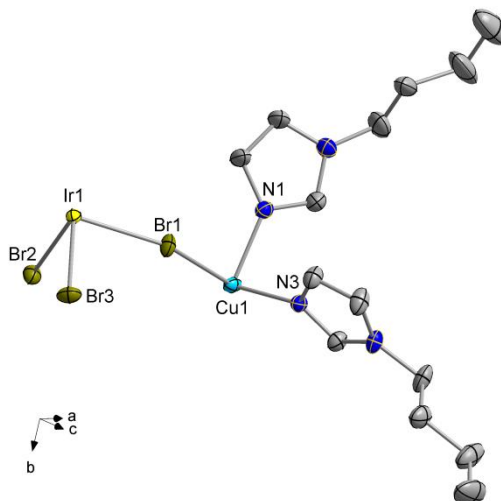

**Figure S1.** Asymmetric units of compounds **2** (top), **3** (middle) and **4** (bottom). Hydrogen atoms have been omitted for clarity. Thermal ellipsoids are depicted at the 50% probability level.

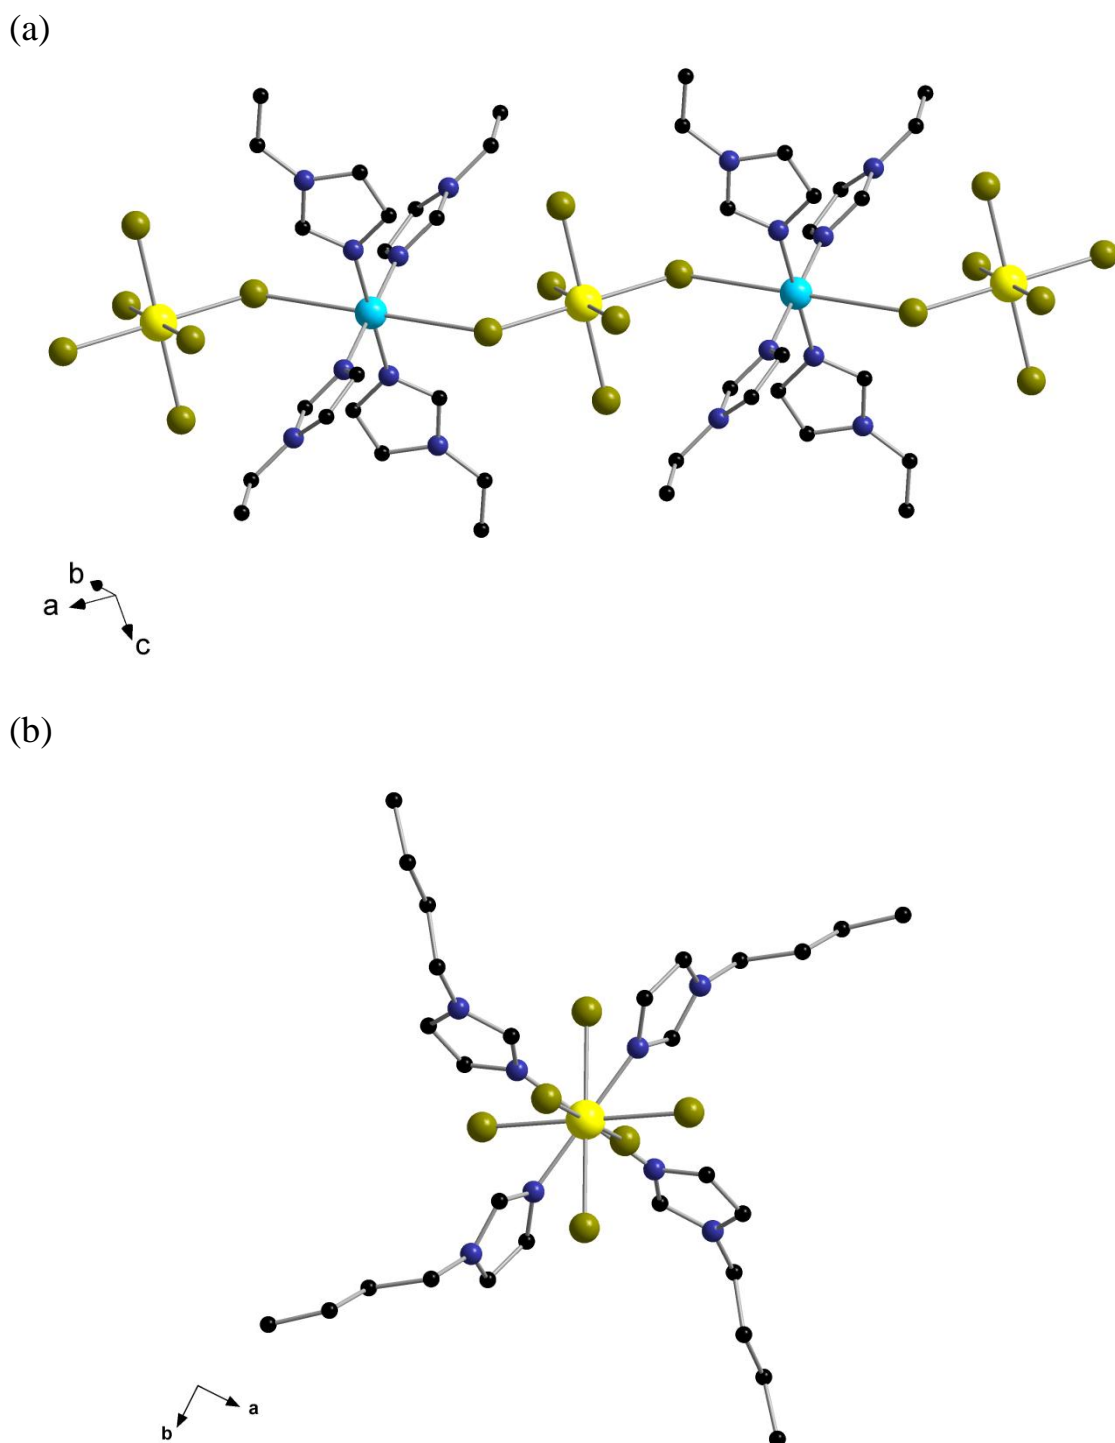

**Figure S2.** (a) Molecular structure of the one-dimensional motif generated in complex **3**. (b) View along the crystallographic *c* axis of the neutral one-dimensional Ir<sup>IV</sup>-Cu<sup>II</sup> complex in **4**. H atoms have been omitted for clarity. Colour code: yellow, Ir; pale blue, Cu; olive green, Br; dark blue, N; black, C.

**Table S1.** Selected bond lengths (Å) and angles (°) for **2-4**.

| <b>Compound</b>    | <b>2</b>    | <b>3</b>   | <b>4</b>   |
|--------------------|-------------|------------|------------|
| Ir(1)-Br(1)        | 2.4807(4)   | 2.4855(4)  | 2.4848(3)  |
| Ir(1)-Br(2)        | 2.4571(4)   | 2.4589(4)  | 2.4736(3)  |
| Ir(1)-Br(3)        | 2.4819(4)   | 2.4655(4)  | 2.4712(3)  |
| Ir(2)-Br(4)        | 2.4909(5)   |            |            |
| Ir(2)-Br(5)        | 2.4817(5)   |            |            |
| Ir(2)-Br(6)        | 2.4699(5)   |            |            |
| Ir(2)-Br(7)        | 2.4729(5)   |            |            |
| Ir(2)-Br(8)        | 2.4539(5)   |            |            |
| Ir(2)-Br(9)        | 2.4801(5)   |            |            |
| Cu(1)-Br(1)        | 3.1756(5)   | 3.1239(4)  | 3.3037(3)  |
| Cu(2)-Br(4)        | 3.1560(9)   |            |            |
| Cu(2)-Br(5)        | 3.2903(9)   |            |            |
| Cu(1)-N(1)         | 1.998(4)    | 2.026(4)   | 1.999(3)   |
| Cu(1)-N(3)         | 2.001(4)    | 1.986(3)   | 1.986(2)   |
| Cu(2)-N(5)         | 1.991(4)    |            |            |
| Cu(2)-N(7)         | 2.000(4)    |            |            |
| Cu(2)-N(9)         | 1.980(4)    |            |            |
| Cu(2)-N(11)        | 1.991(4)    |            |            |
| Br(1)-Ir(1)-Br(2)  | 89.681(15)  | 87.644(13) | 90.283(10) |
| Br(1)-Ir(1)-Br(3)  | 90.580(14)  | 91.211(13) | 90.157(11) |
| Br(1a)-Ir(1)-Br(2) | 90.321(15)  | 92.357(13) | 89.716(10) |
| Br(1a)-Ir(1)-Br(3) | 89.420(14)  | 88.789(13) | 89.843(11) |
| Br(2)-Ir(1)-Br(3)  | 89.770(15)  | 91.745(15) | 89.669(11) |
| Br(2a)-Ir(1)-Br(3) | 90.229(15)  | 88.256(15) | 90.331(11) |
| Br(4)-Ir(2)-Br(5)  | 176.503(18) |            |            |
| Br(4)-Ir(2)-Br(6)  | 91.922(17)  |            |            |
| Br(4)-Ir(2)-Br(7)  | 89.868(17)  |            |            |
| Br(4)-Ir(2)-Br(8)  | 89.063(18)  |            |            |
| Br(4)-Ir(2)-Br(9)  | 90.234(17)  |            |            |
| Br(5)-Ir(2)-Br(6)  | 90.382(17)  |            |            |
| Br(5)-Ir(2)-Br(9)  | 92.467(17)  |            |            |
| Br(6)-Ir(2)-Br(7)  | 89.643(17)  |            |            |
| Br(6)-Ir(2)-Br(8)  | 177.472(18) |            |            |
| N(1)-Cu(1)-N(3)    | 92.00(15)   | 89.50(14)  | 88.36(10)  |
| N(1)-Cu(1)-N(3b)   | 88.00(15)   | 90.50(14)  | 91.63(10)  |
| N(5)-Cu(2)-N(9)    | 178.09(17)  |            |            |
| N(5)-Cu(2)-N(7)    | 90.60(17)   |            |            |
| N(5)-Cu(2)-N(11)   | 90.95(17)   |            |            |
| N(7)-Cu(2)-N(9)    | 88.91(16)   |            |            |
| N(9)-Cu(2)-N(11)   | 89.88(16)   |            |            |

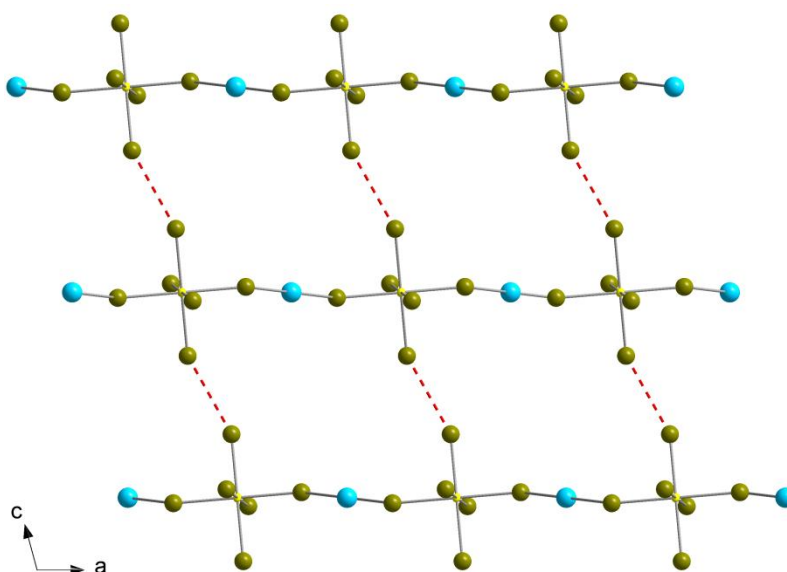

**Figure S3.** View along the crystallographic *b* axis of the 2D grid of  $\{\text{IrBr}_5(\mu\text{-Br})\text{Cu}(\text{Viim})_4\}_n$  chains connected through intermolecular  $\text{Br}\cdots\text{Br}$  interactions in the supramolecular 2D assembly in **3** (dashed red lines). Hydrogen atoms and 1-vinylimidazole ligand have been omitted for clarity. Colour code as in Figure S2.

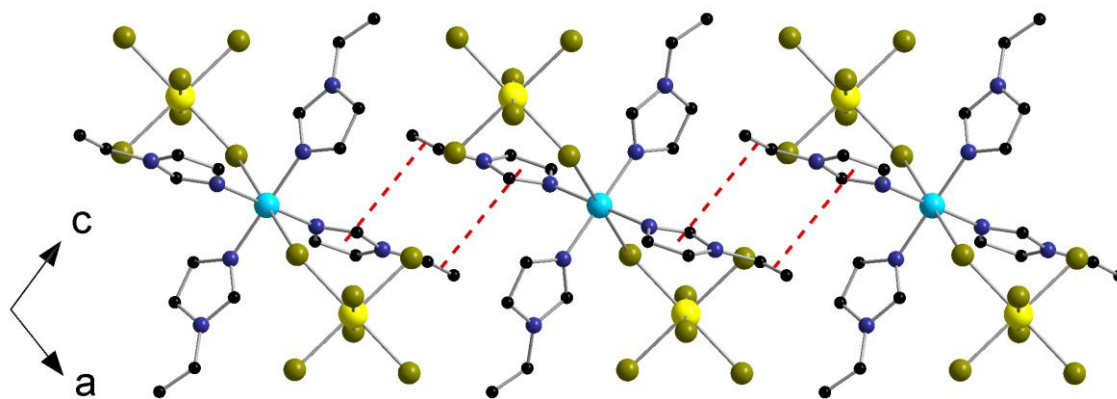

**Figure S4.** A fragment of the crystal packing of **3** showing the  $\pi\cdots\pi$  stacking interactions between the vinyl groups and imidazole rings along the crystallographic *b* axis (dashed red lines). Hydrogen atoms have been omitted for clarity. Colour code as in Figure S2.

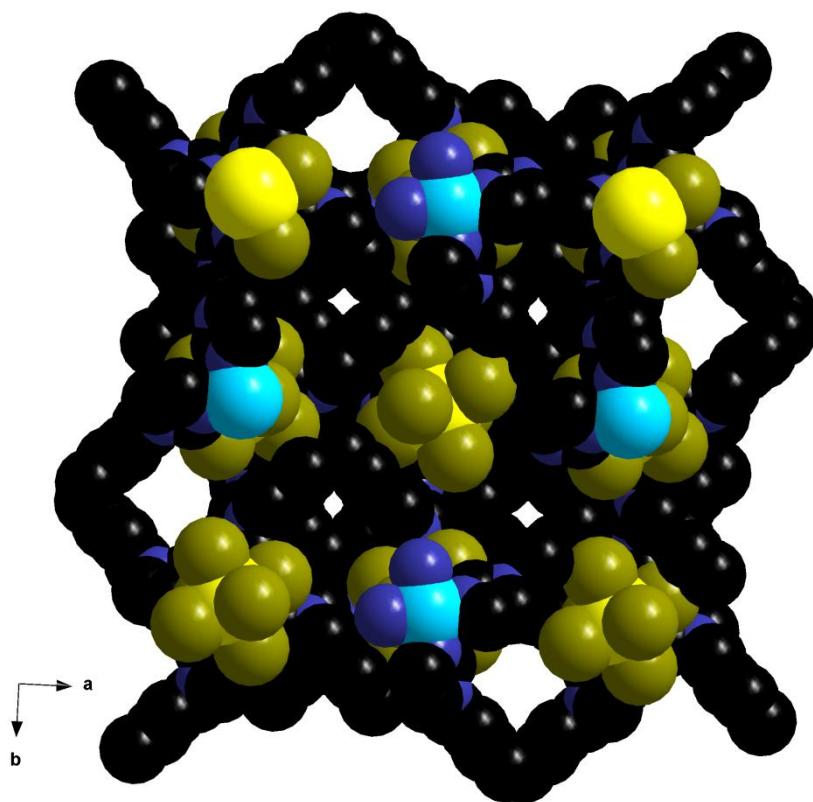

**Figure S5.** View along the crystallographic  $c$  axis of a fragment of the crystal packing of **4** highlighting the supramolecular network of adjacent chains as space-filling model. H atoms have been omitted for clarity. Colour code: yellow, Ir; pale blue, Cu; olive green, Br; dark blue, N; black, C.

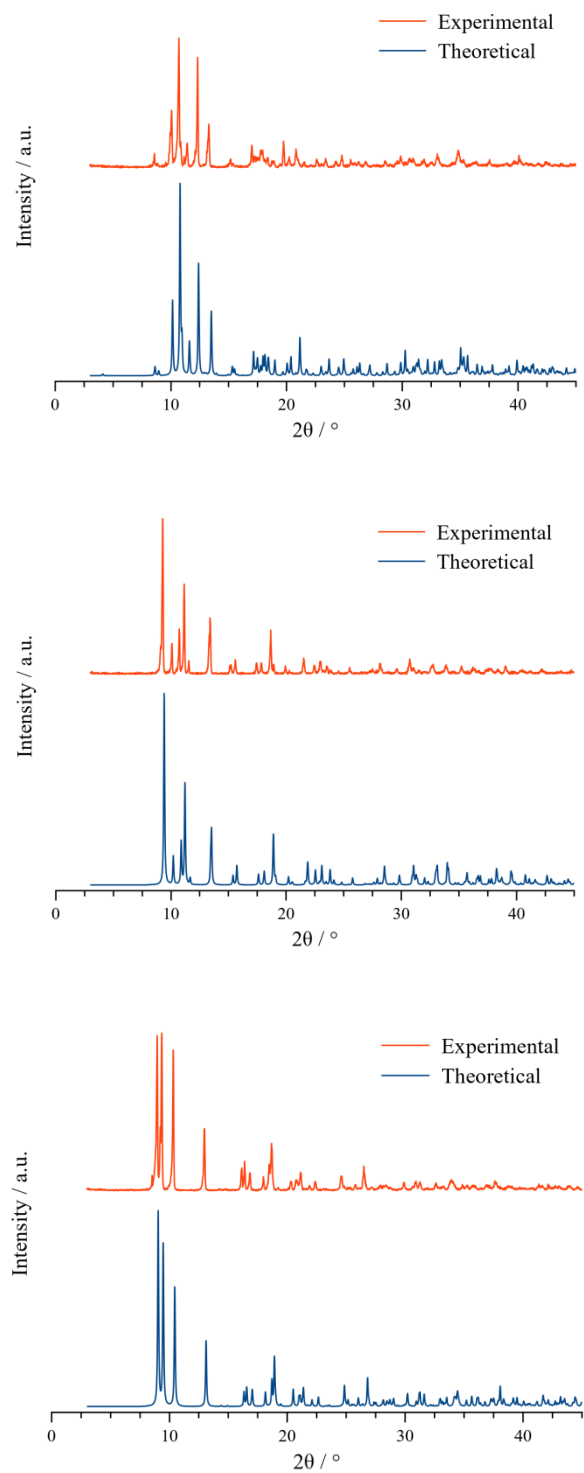

**Figure S6.** Plot of the theoretical (blue line) and experimental (red line) XRD patterns profile ( $2\theta / ^\circ$ ) in the range  $3\text{-}45^\circ$  for compounds **2** (top), **3** (middle) and **4** (bottom).

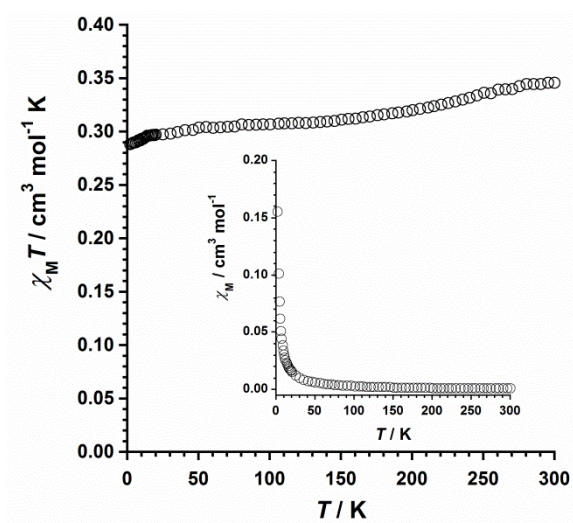

**Figure S7.** Thermal variation of the  $\chi_M T$  product for compound **1**. The inset shows a detail of the thermal variation of the magnetic susceptibility for **1**.

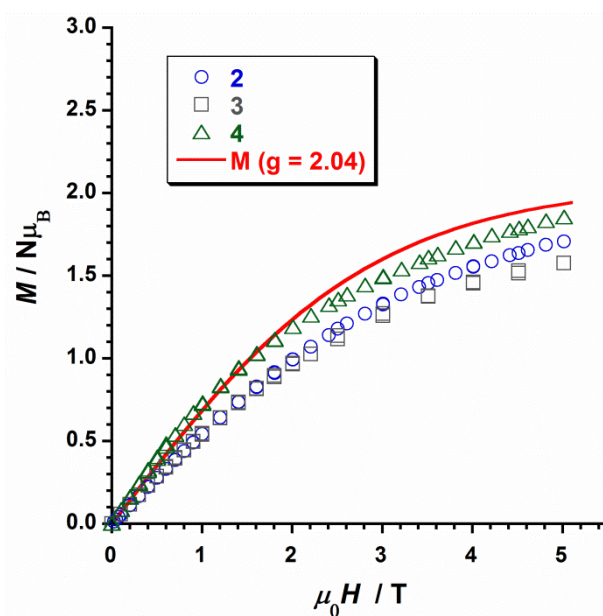

**Figure S8.** Plot of the variable-field magnetisation *versus* applied field at 2.0 K for compounds **2** (blue circles), **3** (grey squares) and **4** (green triangles). The Brillouin curve (red solid line) was obtained with  $g = 2.04$ , a value which is very close to that calculated from the fit of the  $\chi_M T$  *versus*  $T$  plots.
